# Supplementary material
Source: Research Square preprint supplement (doi:10.21203/rs.3.rs-8962009/v1)
Supplement: Supplementary file 1 [file c035716645497b72ef96d35a.docx]

Supplementary Table 1 Baseline Characteristics of MCI Patients According to Oral Frailty Status

| Characteristics | Total  (456) | Training Set(319) | Validation Set  (137) | *x*2/*Z* value | P value |
| --- | --- | --- | --- | --- | --- |
| Sex |  |  |  | 1.100 | 0.294 |
| male | 250(54.8) | 180(56.4) | 70(51.1) |  |  |
| female | 206(45.2) | 139(43.6) | 67(48.9) |  |  |
| Age group |  |  |  | 1.861 | 0.394 |
| 60~69 year | 275(60.3) | 186(58.3) | 89(65.0) |  |  |
| 70~79 year | 156(34.2) | 114(35.7) | 42(30.7) |  |  |
| ≥80 year | 25(5.5) | 19(6.0) | 6(4.3) |  |  |
| BMI,kg/m2 |  |  |  | 3.348 | 0.188 |
| 18.5~23.9 | 137(30.0) | 97(30.4) | 40(29.2) |  |  |
| 24.0~27.9 | 182(40.0) | 134(42.0) | 48(35.0) |  |  |
| ≥28 | 137(30.0) | 88(27.6) | 49(35.8) |  |  |
| Marriage |  |  |  | 3.610 | 0.164 |
| Married | 422(92.5) | 292(91.5) | 130(94.9) |  |  |
| Divorced | 14(3.1) | 13(4.1) | 1(0.7) |  |  |
| Widowed | 20(4.4) | 14(4.4) | 6(4.4) |  |  |
| Education Level |  |  |  | 4.762 | 0.313 |
| Elementary school or lower | 123(27.0) | 84(26.3) | 39(28.5) |  |  |
| Junior high school | 205(45.0) | 149(46.7) | 56(40.9) |  |  |
| High school | 86(18.9) | 60(18.8) | 26(19.0) |  |  |
| Associate's degree | 27(5.9) | 19(6.0) | 8(5.8) |  |  |
| Bachelor's degree or higher | 15(3.2) | 7(2.2) | 8(5.8) |  |  |
| Income |  |  |  | 0.712 | 0.870 |
| ＜1000 RMB | 65(14.3) | 45(14.1) | 20(14.6) |  |  |
| 1000~2999 RMB | 199(43.6) | 143(44.8) | 56(40.9) |  |  |
| 3000~4999 RMB | 141(30.9) | 97(30.4) | 44(32.1) |  |  |
| ＞5000 RMB | 51(11.2) | 34(10.7) | 17(12.4) |  |  |
| Medical insurance |  |  |  | 2.795 | 0.593 |
| Residents' Medical | 304(66.7) | 212(66.5) | 92(67.2) |  |  |
| New Rural Cooperative | 116(25.4) | 78(24.5) | 38(27.7) |  |  |
| Subsistence Allowance | 15(3.3) | 12(3.8) | 3(2.2) |  |  |
| Commercial Insurance | 7(1.5) | 5(1.6) | 2(1.5) |  |  |
| Self-pay | 14(3.1) | 12(3.8) | 2(1.5) |  |  |
| Residential Setting |  |  |  | 0.444 | 0.505 |
| Towns | 279(61.2) | 192(60.2) | 87(63.5) |  |  |
| Rural | 177(38.8) | 127(39.8) | 50(36.5) |  |  |
| Living Arrangement |  |  |  | 0.223 | 0.974 |
| With spouse and children | 47(10.3) | 33(10.3) | 14(10.2) |  |  |
| With spouse | 317(69.5) | 220(69.0) | 97(70.8) |  |  |
| With children | 51(11.2) | 37(11.6) | 14(10.2) |  |  |
| Live alone | 41(9.0) | 29(9.1) | 12(8.8) |  |  |
| Smoking |  |  |  | 0.741 | 0.690 |
| Yes | 156(34.2) | 107(33.5) | 49(35.8) |  |  |
| No | 274(60.1) | 192(60.2) | 82(59.9) |  |  |
| Quit smoking | 26(5.7) | 20(6.3) | 6(4.4) |  |  |
| Drinking |  |  |  | 0.837 | 0.658 |
| Yes | 137(30.0) | 95(29.8) | 42(30.7) |  |  |
| No | 292(64.0) | 203(63.6) | 89(65.0) |  |  |
| Quit drinking | 27(5.9) | 21(6.6) | 6(4.4) |  |  |
| Comorbidity |  |  |  | 0.650 | 0.723 |
| 0 type | 87(19.1) | 61(19.1) | 26(19.0) |  |  |
| 1~3 type | 332(72.8) | 230(72.1) | 102(74.5) |  |  |
| ＞3 type | 37(8.1) | 28(8.8) | 9(6.6) |  |  |
| Sarcopenia |  |  |  | 0.487 | 0.485 |
| Yes | 113(24.8) | 82(25.7) | 31(22.60) |  |  |
| No | 343(75.2) | 237(74.3) | 106(77.4) |  |  |
| Malnutrition |  |  |  | 0.044 | 0.831 |
| Yes | 263(57.7) | 185(58.0) | 78(56.9) |  |  |
| No | 193(42.3) | 134(42.0) | 59(43.1) |  |  |
| Chewing Difficulties |  |  |  | 0.518 | 0.472 |
| Yes | 248(54.4) | 177(55.5) | 71(51.8) |  |  |
| No | 208(45.6) | 142(44.5) | 66(48.2) |  |  |
| Denture |  |  |  | 0.284 | 0.868 |
| None | 181(39.7) | 126(39.5) | 55(40.1) |  |  |
| 1~5 dentures | 236(51.8) | 167(52.4) | 69(50.4) |  |  |
| ＞5 dentures | 39(8.6) | 26(8.1) | 13(9.5) |  |  |
| Oral Frailty |  |  |  | 0.003 | 0.954 |
| Yes | 337(73.9) | 236(74.0) | 101(73.7) |  |  |
| No | 119(26.1) | 83(26.0) | 36(26.3) |  |  |
| Depression,median(IQR) | 9.00(7.00,10.00) | 9.00(7.00,10.00) | 9.00(7.00,10.00) | -1.438 | 0.150 |


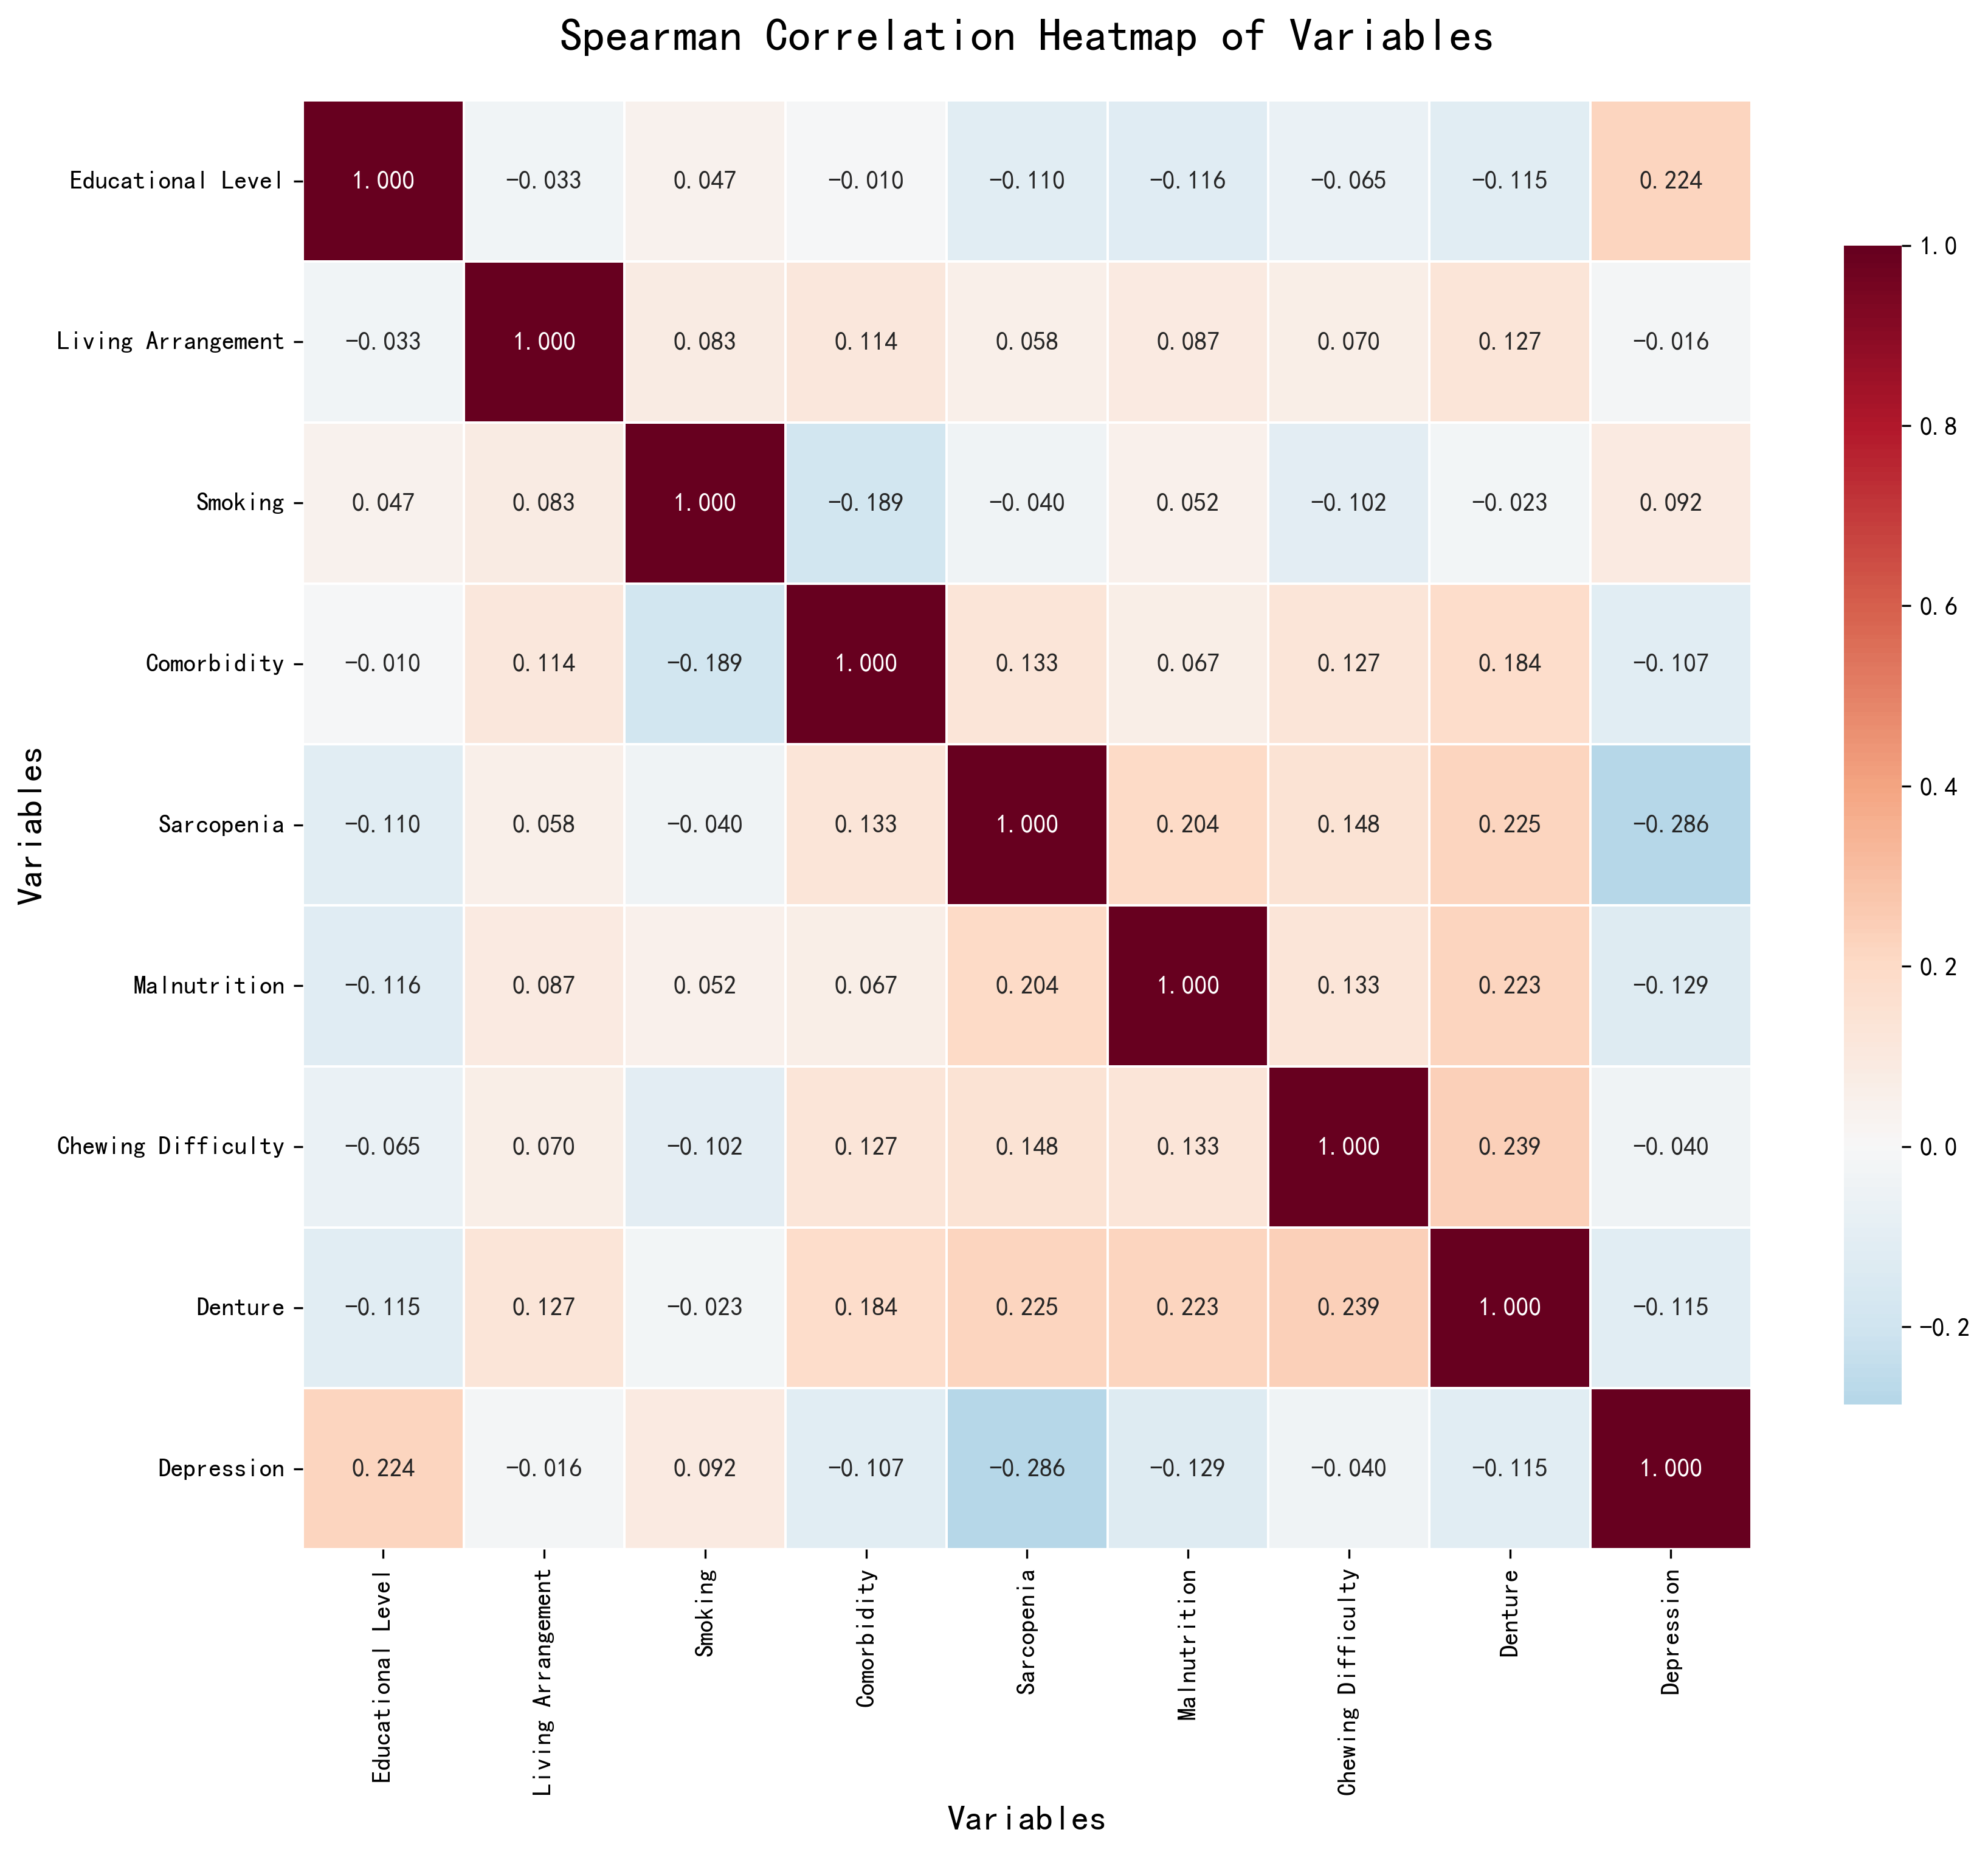


Supplementary Figure 1. Correlation analysis heatmap


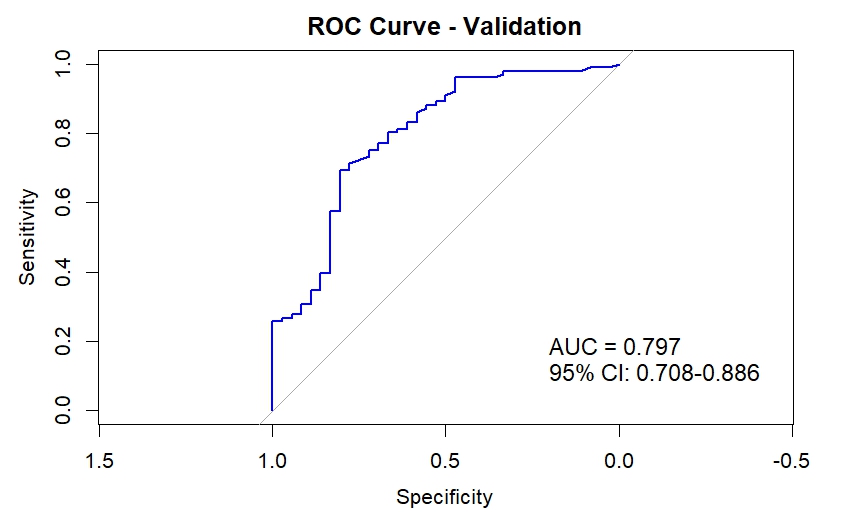


Supplementary Figure 2. ROC curve for the sensitivity analysis
